# Supplementary material
Source: publisher figshare collection journal article supplement (https://gsajournals.figshare.com/ndownloader/files/21195225)
Supplement: Supplementary file 1 [file 21195225]

**Table S3. Segregation ratio of male sterility in Progeny test B**

| Inheritance model | No. of combination | Genotype of ms plant and restorer line | Progeny test B | | | |
| --- | --- | --- | --- | --- | --- | --- |
| ms plant genotype from Test cross A | maintainer line genotype | progeny phenotype (mf:ms ratio) | Test result (All progeny lines) |
| 1 gene with multiple alleles | 1 | *BrMsbMsb* × *BrMsaMsa* | *BrMsbMsb* | *BrMscMsc* | no segregate (0:1) | All lines ms |
| 2 dominant genes | 2 | *BrMsMs rfrf* × *BrMsMs RfRf* | *BrMsMs rfrf* | *Brmsms rfrf* | no segregate (0:1) | All lines ms |
| 2 dominant genes | 3 | *BrMsMs rfrf* × *BrMsms RfRf* | *BrMsMs rfrf* | *Brmsms rfrf* | no segregate (0:1) | Partial lines segregated |
|  |  |  | *BrMsms rfrf* | *Brmsms rfrf* | segregate (1:1) |  |
| 2 dominant genes | 4 | *BrMsMs rfrf* × *Brmsms RfRf* | *BrMsMs rfrf* | *Brmsms rfrf* | no segregate (0:1) | Partial lines segregated |
|  |  |  | *BrMsms rfrf* | *Brmsms rfrf* | segregate (1:1) |  |
| 1 gene with multiple alleles | 5 | *BrMsbMsc* × *BrMsaMsa* | *BrMsbMsb* | *BrMscMsc* | no segregate (0:1) | All lines ms |
| 2 dominant genes | 6 | *BrMsms rfrf* × *BrMsMs RfRf* | *BrMsMs rfrf* | *Brmsms rfrf* | no segregate (0:1) | Partial lines segregated |
|  |  |  | *BrMsms rfrf* | *Brmsms rfrf* | segregate (1:1) |  |
| 2 dominant genes | 7 | *BrMsms rfrf* × *BrMsms RfRf* | *BrMsMs rfrf* | *Brmsms rfrf* | no segregate (0:1) | Partial lines segregated |
|  |  |  | *BrMsms rfrf* | *Brmsms rfrf* | segregate (1:1) |  |
| 2 dominant genes | 8 | *BrMsms rfrf* × *Brmsms RfRf* | *BrMsMs rfrf* | *Brmsms rfrf* | no segregate (0:1) | Partial lines segregated |
|  |  |  | *BrMsms rfrf* | *Brmsms rfrf* | segregate (1:1) |  |
